# Supplementary material
Source: PubMed Central journal article supplement (PMC6463244)
Supplement: nl8b04720_si_012.pdf [file nl8b04720_si_012.pdf]

1 **Supporting Information for Publication**

2

3 Cancer cells invade confined microchannels via a self-directed mesenchymal-to-  
4 amoeboid transition

5

6 Andrew W Holle<sup>a,b</sup>, Neethu Govindan Kutty Devi<sup>a</sup>, Kim Clar<sup>a,c</sup>, Anthony Fan<sup>d</sup>, Taher  
7 Saif<sup>d</sup>, Ralf Kemkemer<sup>†a,c\*</sup>, Joachim P Spatz<sup>†a,b\*</sup>

8

9 <sup>a</sup> Department of Cellular Biophysics, Max Planck Institute for Medical Research,  
10 Heidelberg, Germany

11 <sup>b</sup> Department of Biophysical Chemistry, University of Heidelberg, Heidelberg, Germany

12 <sup>c</sup> Department of Applied Chemistry, Reutlingen University, Reutlingen, Germany

13 <sup>d</sup> Department of Mechanical Science and Engineering, University of Illinois at Urbana-  
14 Champaign, Urbana, IL, USA

15

16 *Associated Content: Supporting Information/Materials and methods*

17

18 **Microchannel fabrication**

19 Two-step photolithography was performed to fabricate the microchannel molds.  
20 Briefly, an 11  $\mu\text{m}$  thick layer of SU-8 10 photoresist (MicroChem, Newton, MA, USA)  
21 was spincoated onto a silicon wafer (Siegert Wafer, Aachen, Germany) and crosslinked  
22 with UV light filtered through a photomask defining channel width at 3 and 10  $\mu\text{m}$   
23 (Compugraphics, Jena, Germany). This was repeated with SU-8 2075 (MicroChem,  
24 Newton, MA, USA) to form a 150  $\mu\text{m}$  thick layer, with a second photomask defining  
25 channel length and reservoir area (**Fig. S4**). Non-crosslinked photoresist was developed  
26 with mr-Dev 600 (Micro Resist Technology, Berlin, Germany). Polydimethylsiloxane  
27 (PDMS) (Dow Corning, Wiesbaden, Germany) was mixed at a 10:1 base to crosslinker  
28 ratio, centrifuged to remove bubbles, poured onto the silicon mold, and baked for four  
29 hours at 80 °C. This formulation has been shown to have a Young's modulus of  
30 approximately 2 MPa<sup>1</sup>, which is nearly an order of magnitude stiffer than the extracellular  
31 matrix through which cancer cells would migrate (0.1-50 kPa)<sup>2</sup>. The PDMS was then  
32 peeled off the mold and cut into square chips with open reservoirs at the center and  
33 periphery. The PDMS chip and glass coverslips were treated with oxygen plasma (0.7  
34 mbar, 300 W) for 25 seconds, brought into contact, and placed in an 80 °C oven for thirty  
35 minutes to facilitate irreversible binding. Type I collagen (100  $\mu\text{g}/\text{mL}$ , Gibco, Carlsbad,  
36 CA, USA) or PBS (for experiments without ECM protein) was then added to the channels  
37 and incubated overnight at 4 °C.

38

39 **Cell culture**

40 MDA-MB-231, HS578T, BT549, MCF7, COLO205, LS178T, HCT8, and  
41 HCT116 cancer cell lines (ECACC, Salisbury, UK) (**Table S1**) were cultured in DMEM  
42 (31966, Gibco) supplemented with 10% FBS and 1% penicillin/streptomycin (100 µg/mL)  
43 (Life Technologies, Darmstadt, Germany). All experiments were performed in a 95%  
44 air/5% CO<sub>2</sub> mixture at 37 °C. SiR-Actin was used (Spirochrome, Stein am Rhein,  
45 Switzerland) for live cell imaging of the cytoskeleton. For inhibitor experiments, Y27632  
46 dihydrochloride (p160ROCK) (LKT Laboratories, Hamburg, Germany) and NSC23766  
47 (Rac1) (Santa Cruz Biotechnology, Dallas, TX, USA) were used at a concentration of 30  
48 µM and 100 µM, respectively. At these concentrations, Y27632 has also been shown to  
49 inhibit protein kinase C (26 µM) and cAMP-dependent protein kinase (25 µM)<sup>3</sup>.  
50 NSC23766 functions as an inhibitor of Rac1-GEF interaction, but has also been shown to  
51 have off-target effects on acetylcholine inhibitors<sup>4</sup>.

52

53 **Microchannel invasion experiments**

54 Chips were removed from 4 °C storage, rinsed in PBS, and glued to the bottom of  
55 a well in a six well plate with Picodent dental glue (Picodent, Wipperfürth, Germany).  
56 Sterilization was performed for 25 minutes under UV light. Cells were trypsinized and  
57 resuspended to a density of  $1 \times 10^6$  cells/mL. 100 µL (100,000 cells) of the cell solution  
58 was added to the center chamber of the invasion chip. While the center of the chip is open  
59 to the atmosphere, the reservoirs are approximately 150 µm tall, confining the volume of  
60 cell solution in front of the channels to approximately 60 nL. This quantity of cells was  
61 chosen in order to introduce enough cells to encourage channel interactions but not so many

62 that cell-cell interactions began to influence migration. Cells were allowed to attach for  
63 one hour before the entire well was filled with media and the samples were transferred to  
64 the microscope. As the heights of the media column above both the inside and outside  
65 regions of the chip are equal, no hydrostatic pressure induced fluid flow is possible. For  
66 inhibitor experiments, the inhibitor was added one hour after the cells. For experiments in  
67 which channels were used without ECM proteins, cells were resuspended in FBS-free  
68 DMEM to prevent non-specific protein adsorption in the channels. Phase contrast live-cell  
69 imaging was performed in a cell culture chamber built around an Axiovert 200M inverted  
70 microscope with a motorized stage (Carl Zeiss, Jena, Germany). Images were collected  
71 every ten minutes from up to 50 fields of view per experiment for 24 hours.

72 For experiments utilizing the SiR series of live cell dyes, the cell-permeable dye  
73 was introduced to cells at a concentration of 100 nM (SiR-Actin) and allowed to incubate  
74 for 6 hours before imaging. Live cell fluorescent imaging was performed with an LSM 880  
75 confocal laser scanning microscope (Zeiss).

76

## 77 **Image analysis**

78 Image sequences were analyzed in Fiji (NIH)<sup>5</sup> using the manual tracking plugin to  
79 identify the position of the leading edge of permeating cells that were fully within the  
80 channel. Data obtained from image analysis was analyzed in Microsoft Excel, with  
81 instantaneous cell speeds calculated for each 10-minute increment and average cell speeds  
82 calculated by averaging the average speeds of each cell. Cells were grouped within three  
83 characteristic categories: *penetrative* cells were those that sent protrusions at least 10  $\mu\text{m}$   
84 into a channel, *invasive* cells were those that sent protrusions at least 75  $\mu\text{m}$  into the channel

85 or fully entered, and *permeative* cells were those that entered and subsequently exited the  
86 opposite side of the channel. Cell speeds were only calculated for cells that fully permeated  
87 a channel. The method for tracking cell permeation involved identifying a permeative cell,  
88 rewinding the movie to find when it began the permeative process, then tracking the  
89 position of the leading edge until the it exited the channel. As some cells spent extended  
90 amounts of time interacting with the channel entrance prior to the permeative event, some  
91 measurements began when the cell's leading edge was already 5-10 microns into the  
92 channel. For cells that had already started the permeative process at the beginning of the  
93 video, the event was analyzed as long as the leading edge was not farther than 50  $\mu\text{m}$  into  
94 the channel. Kymographs of permeating cells were constructed in Fiji. All images  
95 displayed in figures for comparison are scaled identically.

96

### 97 **Immunofluorescence**

98 Cells were fixed in 3.7% formaldehyde for 15 minutes and permeabilized in 0.1%  
99 Triton X-100. Cells were then stained with primary antibodies against human paxillin  
100 (ab32084, Abcam, Cambridge, UK) and  $\beta 1$  integrin (MAB17781, Millipore, Burlington,  
101 MA, USA). Corresponding secondary antibodies were conjugated to Alexa Fluor 488  
102 (FITC) or Alexa Fluor 647 (Cy5) (Life Technologies, Carlsbad, CA, USA). Nuclei were  
103 counterstained with Hoechst dye (Thermo Scientific, Rockford, IL, USA) and actin was  
104 stained with Alexa Fluor 568 Phalloidin (Life Technologies). For integrin  $\beta 1$  imaging, cells  
105 were permeabilized in a 0.5% Saponin in PBS solution for 10 minutes at room temperature  
106 to prevent membrane solubilization, non-selective protein extraction, and false negatives<sup>6</sup>.

107 To image protein adsorption, empty channels conjugated with ECM proteins were stained  
108 with primary antibodies against human collagen (ab34710, Abcam).

109

### 110 **Statistical Analysis**

111 Data analysis was performed in Microsoft Excel and Graphpad Prism. At least 3  
112 independent replicates were performed for each experiment. Technical repeats in the form  
113 of both multiple chips observed per experiment and multiple positions recorded from each  
114 chip were also performed. Sample sizes are indicated in figure captions. Two-tailed  
115 Student's t tests were used when only two populations were compared. One-way ANOVA  
116 was utilized to compare multiple population means when multiple comparisons were  
117 required, with individual post hoc comparisons performed with Sidak's multiple  
118 comparisons test.

119

120 **Supplemental Figures**

A Orthogonal views, 10  $\mu\text{m}$  microchannel

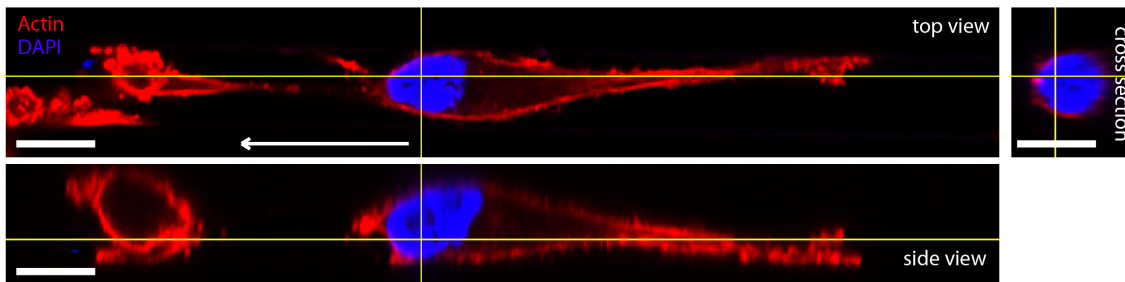

B Maximum intensity projection, 10  $\mu\text{m}$  microchannel

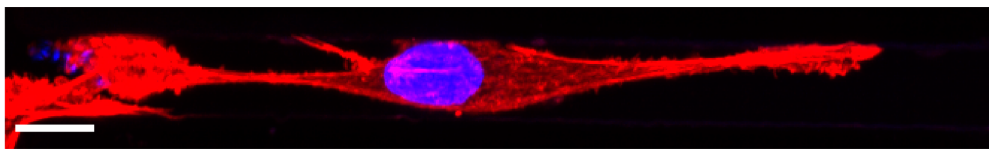

C 3D projection, 10  $\mu\text{m}$  microchannel

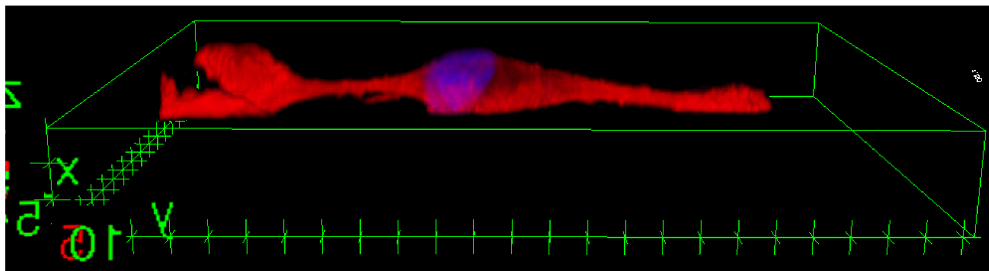

121

122 **Figure S1: Three dimensional projections of an MDA-MB-231 breast cancer cell in**

123 **a 10  $\mu\text{m}$  microchannel. A) Top, side, and cross sectional orthogonal slices are shown.**

124 **Scale bars=10  $\mu\text{m}$  for all projections. B) Top view of maximum intensity projection.**

125 **Scale bar=10  $\mu\text{m}$ . C) Rotated 3D projection.**

126

A Orthogonal views, 3  $\mu\text{m}$  microchannel

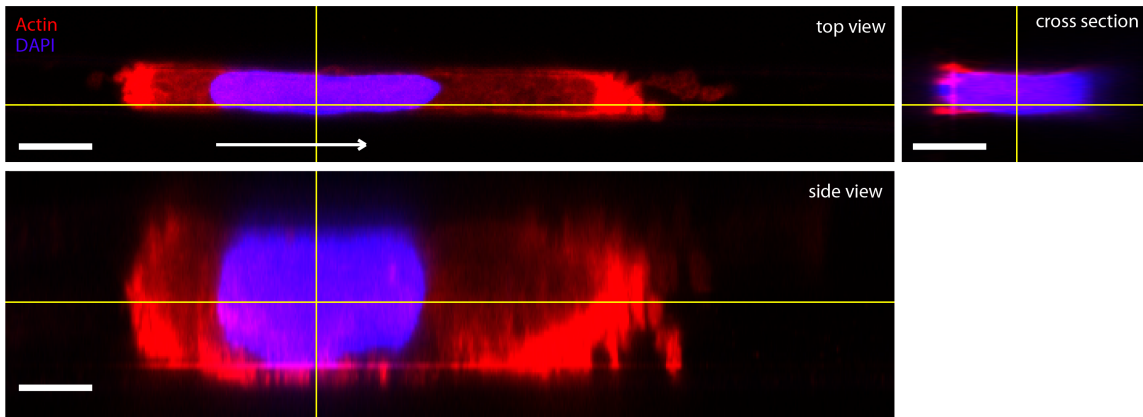

B Maximum intensity projection, 3  $\mu\text{m}$  microchannel

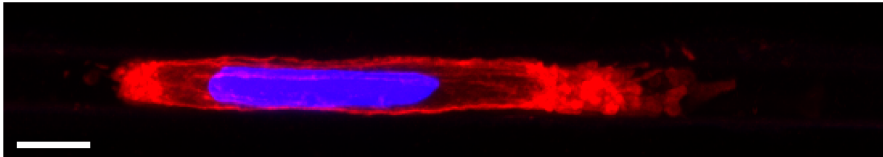

C 3D projection, 3  $\mu\text{m}$  microchannel

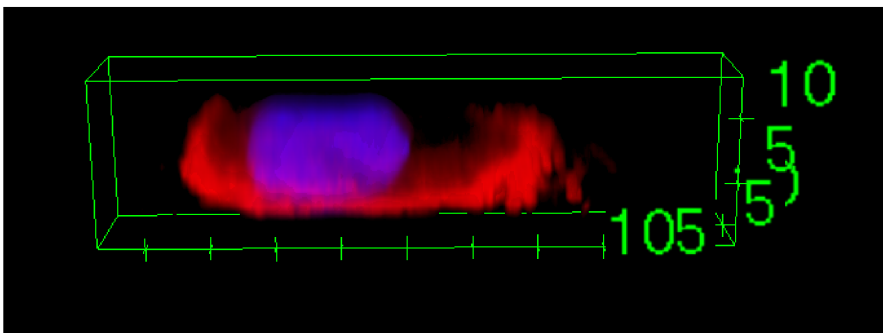

127

128 **Figure S2: Three dimensional projections of an MDA-MB-231 breast cancer cell in**

129 **a 3  $\mu\text{m}$  microchannel. A)** Top, side, and cross sectional orthogonal slices are shown.

130 Scale bars=5  $\mu\text{m}$  for all projections. **B)** Top view of maximum intensity projection. Scale

131 bar=5  $\mu\text{m}$ . **C)** Rotated 3D projection.

132



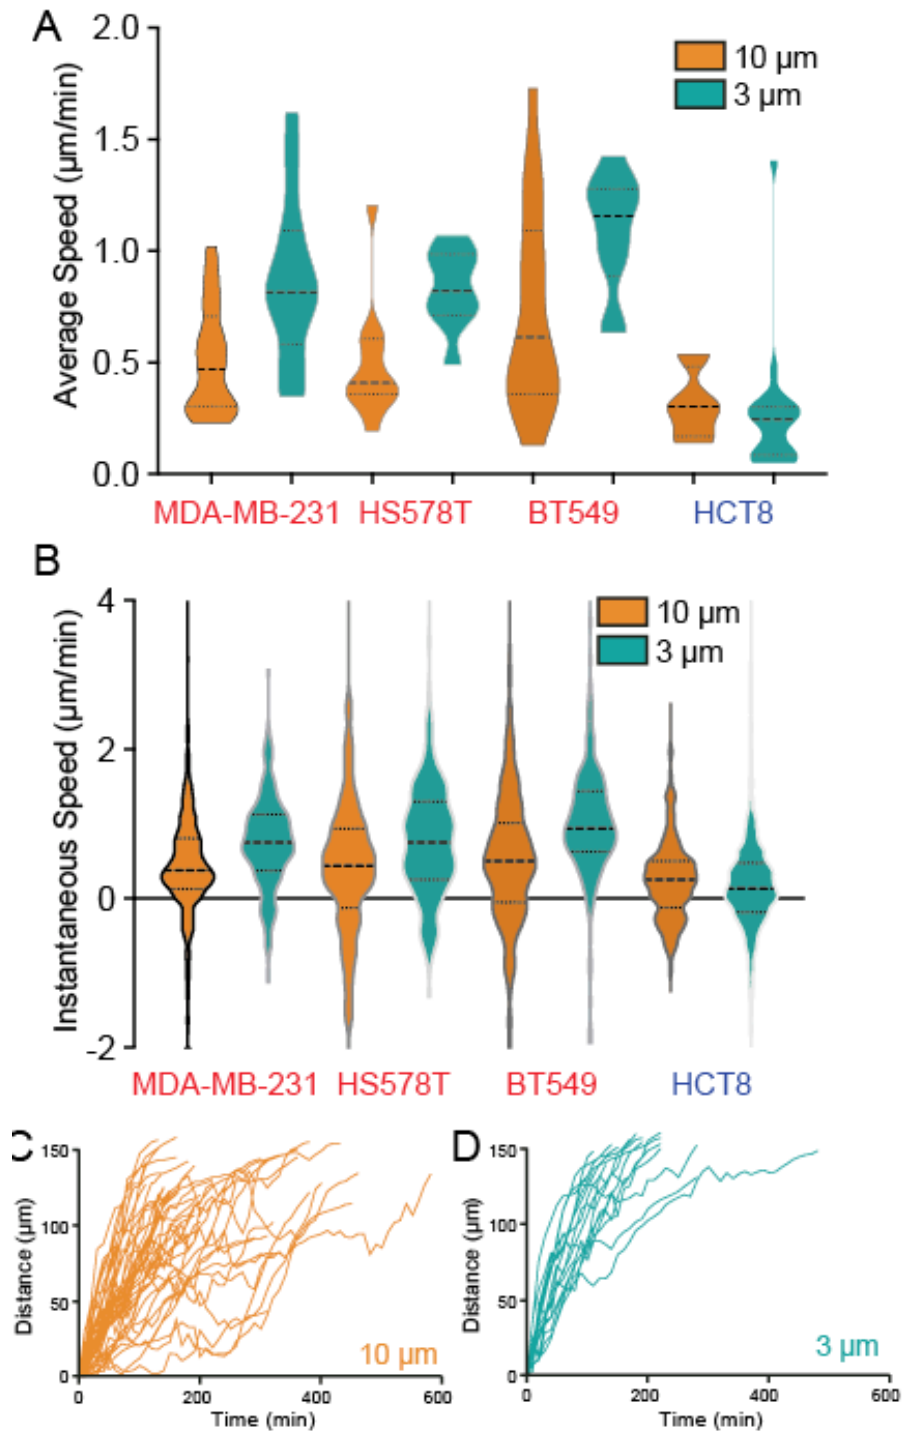

133

134 **Figure S3:** Violin plots of the A) average cell speed and B) instantaneous cell velocity  
 135 measured across four different permeative cell lines. C-D) Individual traces of leading  
 136 edge position over time in 10  $\mu\text{m}$  and 3  $\mu\text{m}$  channels.

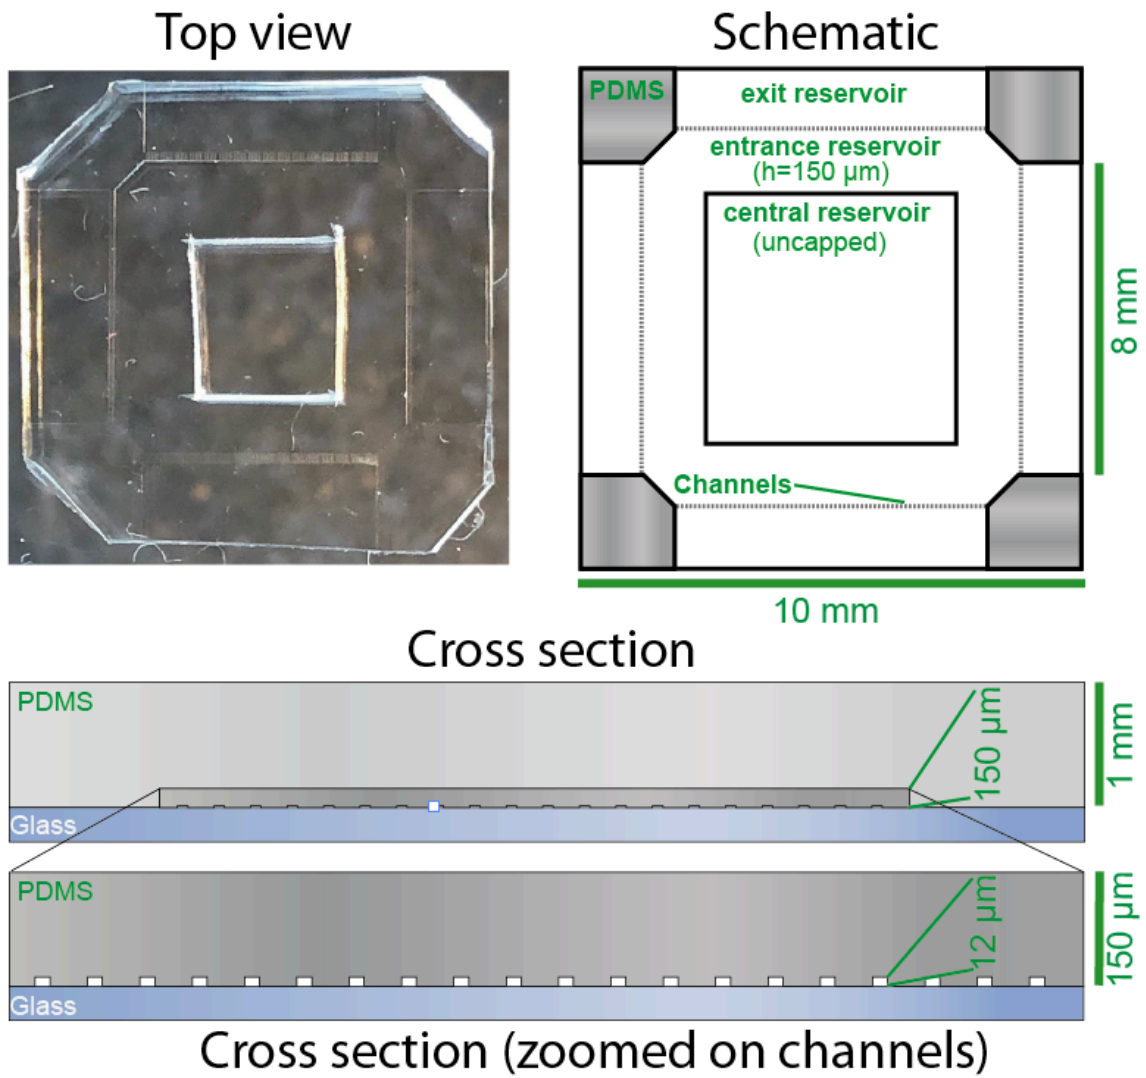

137

138 **Figure S4:** A picture and schematic of the microchannel chip

139

140 **Supplemental Video Captions**

141 **Video S1:** Phase contrast time lapse imaging of an MDA-MB-231 cell permeating a 3  
142  $\mu\text{m}$  channel. Bleb structures are observed upon channel exit. This video is displayed at 10  
143 frames per second with each frame representing 10 minutes.

144

145 **Video S2:** Phase contrast time lapse imaging of an HS578T cell permeating a 3  $\mu\text{m}$   
146 channel. Bleb structures are observed upon channel exit. This video is displayed at 10  
147 frames per second with each frame representing 10 minutes.

148

149 **Video S3:** Phase contrast time lapse imaging of a BT549 cell permeating a 3  $\mu\text{m}$  channel.  
150 Bleb structures are observed upon channel exit. This video is displayed at 10 frames per  
151 second with each frame representing 10 minutes.

152

153 **Video S4:** Phase contrast time lapse imaging of an HCT-8 cell permeating a 3  $\mu\text{m}$   
154 channel. Bleb structures are observed upon channel exit. This video is displayed at 10  
155 frames per second with each frame representing 10 minutes.

156

157 **Video S5:** Maximum intensity projection of a confocal time lapse image of an SiR-Actin  
158 labeled MDA-MB-231 cell moving through a 10  $\mu\text{m}$  channel. This video is displayed at  
159 10 frames per second with each frame representing 10 minutes.

160

161 **Video S6:** Maximum intensity projection of a confocal time lapse image of an SiR-Actin  
162 labeled MDA-MB-231 cell moving through a 3  $\mu\text{m}$  channel. This video is displayed at  
163 10 frames per second with each frame representing 10 minutes.

164

165 **Video S7:** Phase contrast time lapse imaging of MDA-MB-231 cells in a protein-free  
166 PDMS chip with 10  $\mu\text{m}$  widths in 0% FBS media. This video is displayed at 10 frames  
167 per second with each frame representing 10 minutes.

168

169 **Video S8:** Phase contrast time lapse imaging of MDA-MB-231 cells in a protein-free  
170 PDMS chip with 3  $\mu\text{m}$  widths in 0% FBS media. This video is displayed at 10 frames per  
171 second with each frame representing 10 minutes.

172

173 **Video S9:** Phase contrast time lapse imaging of an MCF-7 cell in a 10  $\mu\text{m}$  channel.  
174 MCF-7 cells do not permeate 3  $\mu\text{m}$  channels. This cell displays amoeboid characteristics  
175 while permeating the wide 10  $\mu\text{m}$  channel. This video is displayed at 10 frames per  
176 second with each frame representing 10 minutes.

177

178 **Video S10:** Phase contrast time lapse imaging of MDA-MB-231 cells in a 10  $\mu\text{m}$   
179 channel. One cell permeates the microchannel, then re-enters a different microchannel

180 and migrates back towards the cell reservoir. This video is displayed at 10 frames per  
181 second with each frame representing 10 minutes.

182

183 **Video S11:** Phase contrast time lapse imaging of MDA-MB-231 cells in a 3  $\mu\text{m}$  channel  
184 displaying contact guidance along the edges of the chip after exiting. This video is  
185 displayed at 10 frames per second with each frame representing 10 minutes.

186

| <i>Cell line</i>  | <i>Tissue</i> | <i>Disease</i>            | <i>Tumorigenic</i> | <i>Invasive</i> | <i>Cell type</i> | <i>Citation</i>  | <i>Receptors</i> | <i>Notes</i> |
|-------------------|---------------|---------------------------|--------------------|-----------------|------------------|------------------|------------------|--------------|
| <b>MDA-MB-231</b> | Breast        | Invasive ductal carcinoma | Yes                | Yes             | Epithelial       | <sup>7,8</sup>   | Triple negative  | Claudin-low  |
| <b>Hs578T</b>     | Breast        | Carcinosarcoma            | Yes                | Yes             | Epithelial       | <sup>7,9</sup>   | Triple negative  | Claudin-low  |
| <b>BT549</b>      | Breast        | Invasive ductal carcinoma | Yes                | Yes             | Epithelial       | <sup>7,8</sup>   | Triple negative  | Claudin-low  |
| <b>MCF-7</b>      | Breast        | Invasive ductal carcinoma | Yes                | No              | Epithelial       | <sup>7,10</sup>  | HER2-            | Luminal A    |
| <b>COLO 205</b>   | Colon         | Colorectal adenocarcinoma | Yes                | High            | Epithelial       | <sup>11,12</sup> |                  |              |
| <b>HCT-8</b>      | Colon         | Colorectal adenocarcinoma | Yes                | Low             | Epithelial       | <sup>13-15</sup> |                  |              |
| <b>HCT-116</b>    | Colon         | Colorectal carcinoma      | Yes                | Low             | Epithelial       | <sup>13,16</sup> |                  |              |
| <b>LS174T</b>     | Colon         | Colorectal adenocarcinoma | Yes                | Mid             | Epithelial       | <sup>14,17</sup> |                  |              |
|                   |               |                           |                    |                 |                  |                  |                  |              |

187

188 **Table S1: Cell lines used in microchannel invasion assay.** Characterization of tumorigenesis and invasiveness can vary based on  
189 experimental protocol. For example, HCT-8 colorectal cancer cells have been shown to not be tumorigenic in spleens and livers of  
190 nude mice<sup>14</sup>, but were found to generally tumorigenic in nude mice in a different study<sup>15</sup>. Low, middle, and high levels of invasiveness  
191 are often comparative metrics and can also vary across experimental systems (through Matrigel, collagen matrices, or Boyden  
192 chamber pores). Descriptions of receptor expression and further characterizing features are given for breast cancer cell lines.

193

194

195 **References (Supplemental Material)**

- 196 (1) Johnston, I. D.; McCluskey, D. K.; Tan, C. K. L.; Tracey, M. C. *J. Micromech.*  
197 *Microeng.* **2014**, *24* (3), 035017.
- 198 (2) Holle, A. W.; Van Vliet, K. J.; Kamm, R. D.; Discher, D.; Janmey, P.; Saif, T.  
199 *Nano Lett.* **2017**, *18* (1), 1–8.
- 200 (3) Uehata, M.; Ishizaki, T.; Satoh, H.; Ono, T. *Nature* **1997**.
- 201 (4) Levay, M.; Krobert, K. A.; Wittig, K.; Voigt, N.; Bermudez, M.; Wolber, G.;  
202 Dobrev, D.; Levy, F. O.; Wieland, T. *J Pharmacol Exp Ther* **2013**, *347* (1), 69–  
203 79.
- 204 (5) Schindelin, J.; Arganda-Carreras, I.; Frise, E.; Kaynig, V.; Longair, M.; Pietzsch,  
205 T.; Preibisch, S.; Rueden, C.; Saalfeld, S.; Schmid, B.; Tinevez, J.-Y.; White, D.  
206 J.; Hartenstein, V.; Eliceiri, K.; Tomancak, P.; Cardona, A. *Nature Methods*  
207 **2012**, *9* (7), 676–682.
- 208 (6) Jamur, M. C.; Oliver, C. In *Immunocytochemical Methods and Protocols*;  
209 *Methods in Molecular Biology*; Humana Press: Totowa, NJ, 2010; Vol. 588, pp  
210 63–66.
- 211 (7) Evtimova, V.; Zeillinger, R.; Weidle, U. H. *Tumor Biol.* **2003**, *24* (4), 189–198.
- 212 (8) Tate, C. R.; Rhodes, L. V.; Segar, H. C.; Driver, J. L.; Pounder, F. N.; Burow, M.  
213 E.; Collins-Burow, B. M. *Breast Cancer Res.* **2012**, *14* (3).
- 214 (9) Daniel, J.; Coulter, J.; Woo, J.-H.; Wilsbach, K.; Gabrielson, E. *PNAS* **2011**, *108*  
215 (13), 5384–5389.
- 216 (10) Shafie, S. M.; Liotta, L. A. *Cancer Letters* **1980**, *11* (2), 81–87.
- 217 (11) de Toledo, M.; Anguille, C.; Roger, L.; Roux, P.; Gadea, G. *PLoS ONE* **2012**, *7*  
218 (11), e48344.
- 219 (12) Senger, D. R.; Perruzzi, C. A. *Cancer Research* **1985**, *45* (11), 5818–5823.
- 220 (13) Vermeulen, S. J.; Bruyneel, E. A.; Bracke, M. E.; Debryne, G. K.; Vennekens,  
221 K. M.; Vleminckx, K. L.; Berx, G. J.; Vanroy, F. M.; Mareel, M. M. *Cancer*  
222 *Research* **1995**, *55* (20), 4722–4728.
- 223 (14) Tibbetts, L. M.; Doremus, C. M.; Tzanakakis, G. N.; Vezeridis, M. P. *Cancer*  
224 **1993**, *71* (2), 315–321.
- 225 (15) Rosenthal, K. L.; Tompkins, W.; Frank, G. L.; McCulloch, P.; Rawls, W. E.  
226 *Cancer Research* **1977**, *37* (11), 4024–4030.
- 227 (16) Zhu, F.; Zykova, T. A.; Kang, B. S.; Wang, Z.; Ebeling, M. C.; Abe, Y.; Ma, W.  
228 Y.; Bode, A. M.; Dong, Z. *Gastroenterology* **2007**, *133* (1), 219–231.
- 229 (17) Brabletz, T.; Jung, A.; Reu, S.; Porzner, M.; Hlubek, F.; Kunz-Schughart, L. A.;  
230 Knuechel, R.; Kirchner, T. *PNAS* **2001**, *98* (18), 10356–10361.

231
